# Supplementary material
Source: Springer Nature journal article supplement (http://www.springermedizin.de/resource/supplementary/13075_2010_9695_MOESM5_ESM.pdf/9693554)

# Strength

SMD, 95% CI

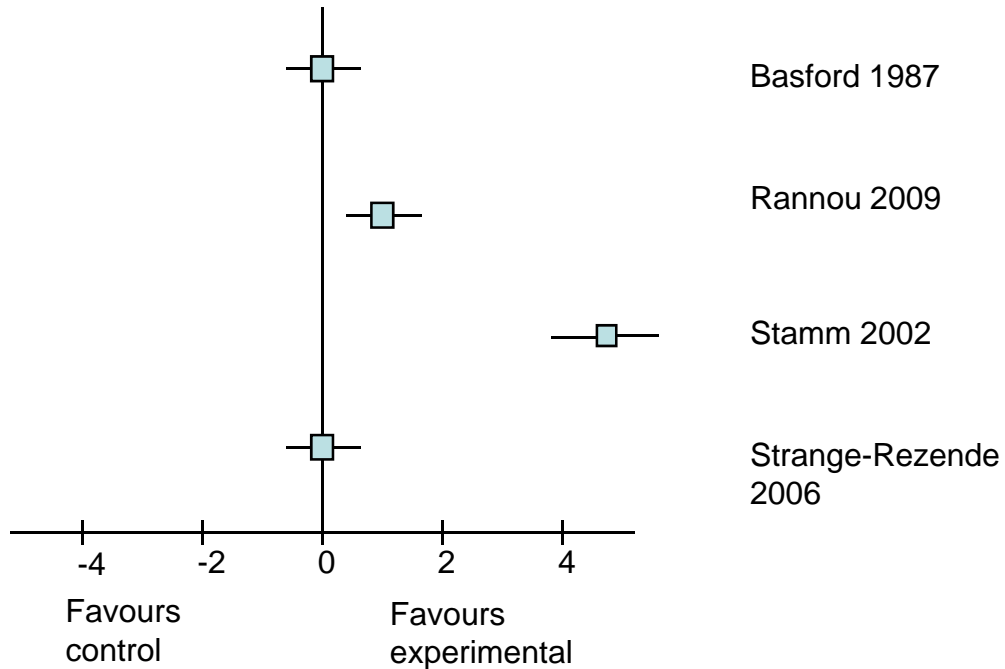

Supplement: MOESM5 [file 9693554]
